# Supplementary material
Source: publisher figshare collection journal article supplement (https://acs.figshare.com/ndownloader/files/4707364)
Supplement: Supplementary file 1 [file 4707364]

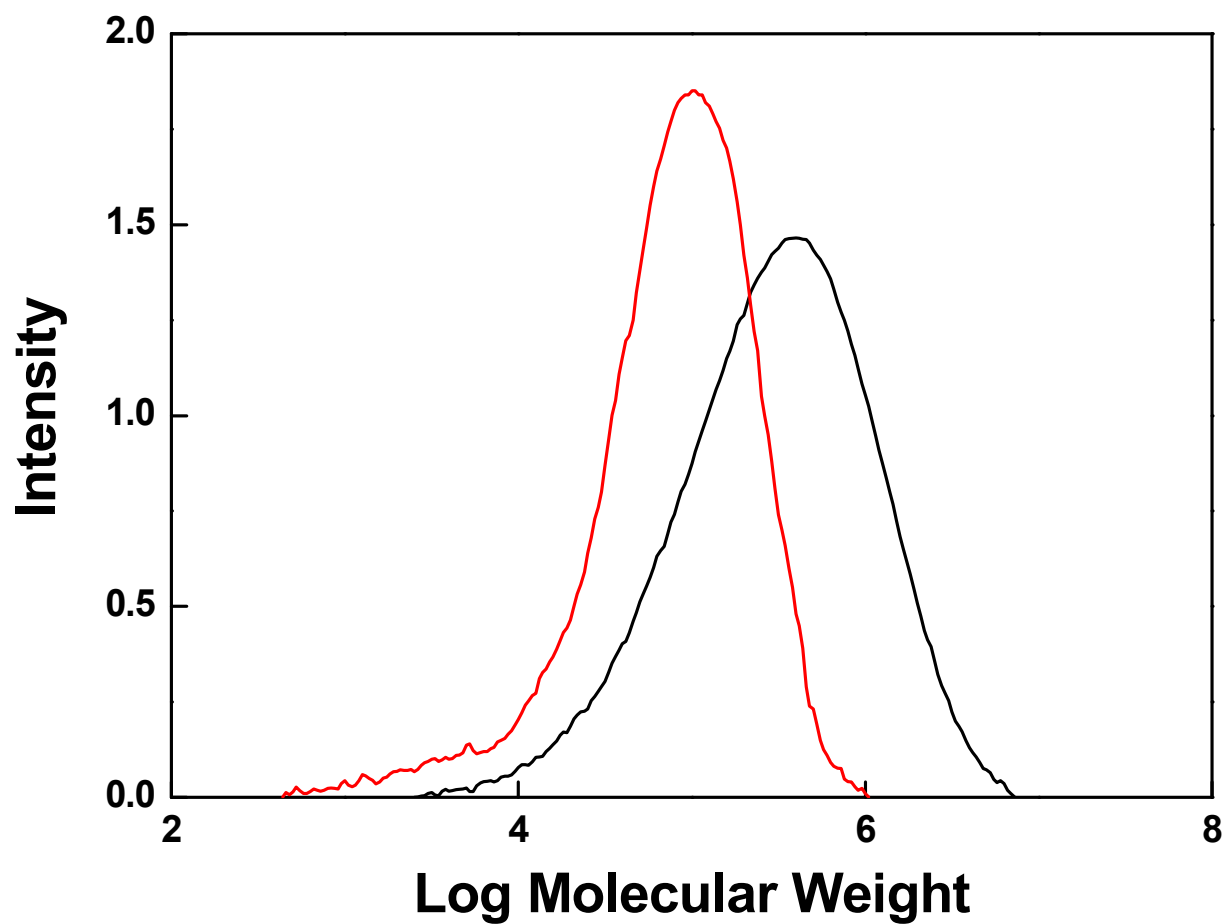

**Figure S1.** GPC curves for the PEs having the higher (black) and lower MW materials (red) used in this study. These curves were recorded in a solvent of 1,2,4 trichlorobenzene at Tosoh (Yokkaichi, Japan) using standard methods.

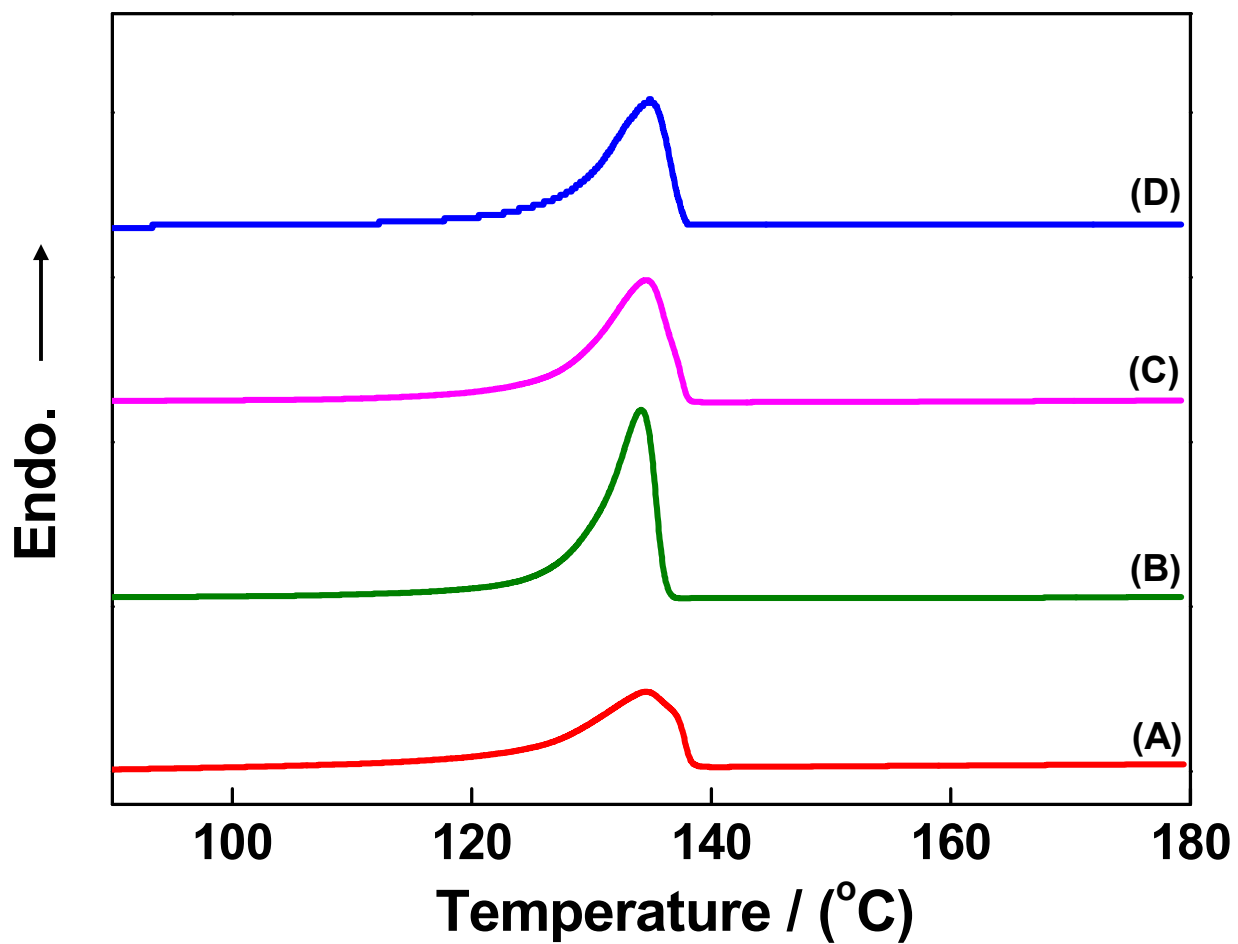

**Figure S2.** DSC melting endotherms for the pure and blended films prepared under different melt-holding time. The heating scans were performed up to 180 °C at a heating rate of 10 °C/min under nitrogen gas flow. (A) higher MW, 10min ; (B) lower MW, 10 min ; (C) 50/50 blend, 10 min ; (D) 50/50 blend, 3 hours.

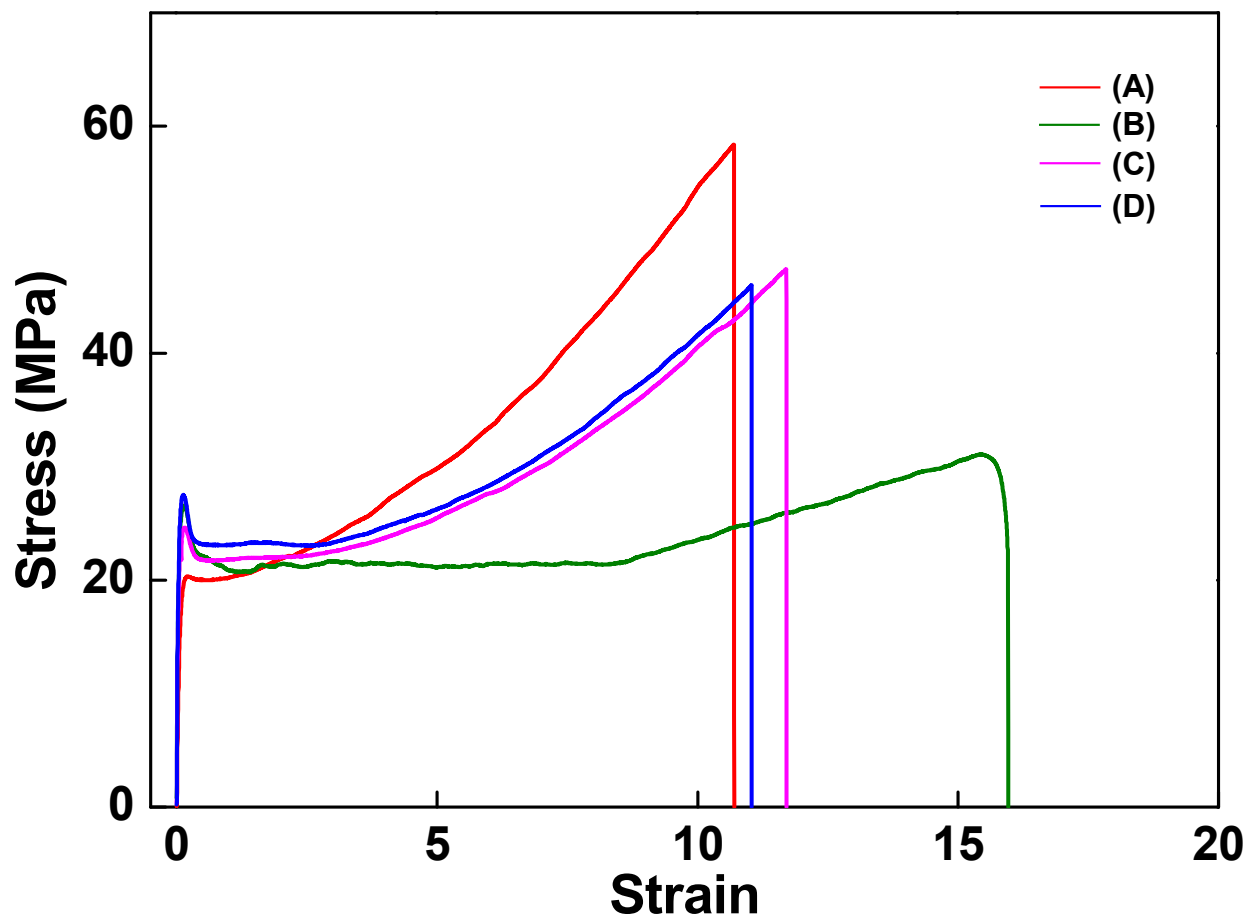

**Figure S3.** Stress/strain curves for the pure and blended films prepared under different melt-holding time. All tensile tests were made at room temperature and an initial strain rate of  $2 \text{ min}^{-1}$ . (A) higher MW, 10min ; (B) lower MW, 10min ; (C) 50/50 blend, 10min ; (D) 50/50 blend, 3hours.
